# Supplementary material
Source: PubMed Central journal article supplement (PMC6820131)

Supplemental Fig. 1

Platelet protein expression of P2Y<sub>12</sub> receptor is not affected in patients treated with either Clopidogrel and Prasugrel. Washed human platelets were collected for baseline and 1h POST-termination of the infusion. Top-western blot analysis of individual patients was probed with the antibody for P2Y<sub>12</sub> and  $\beta$ -actin control. Bar graph showing the relative platelet expression from the top panel of P2Y<sub>12</sub>, after normalization to  $\beta$ -actin expression. Results are presented as means $\pm$ SE.

Supplemental Fig. 2

Clopidogrel attenuates plasma TAT levels 16h after PCI. Median plasma levels of thrombin-antithrombin complexes (TAT) were assessed by ELISA at baseline, after 1, 2, 4 and 16h POST-termination of the infusion. ELISAs were performed in duplicate or triplicate and the mean $\pm$ SD are shown, Prasugrel (●), Clopidogrel (○).

# P2Y12 Expression

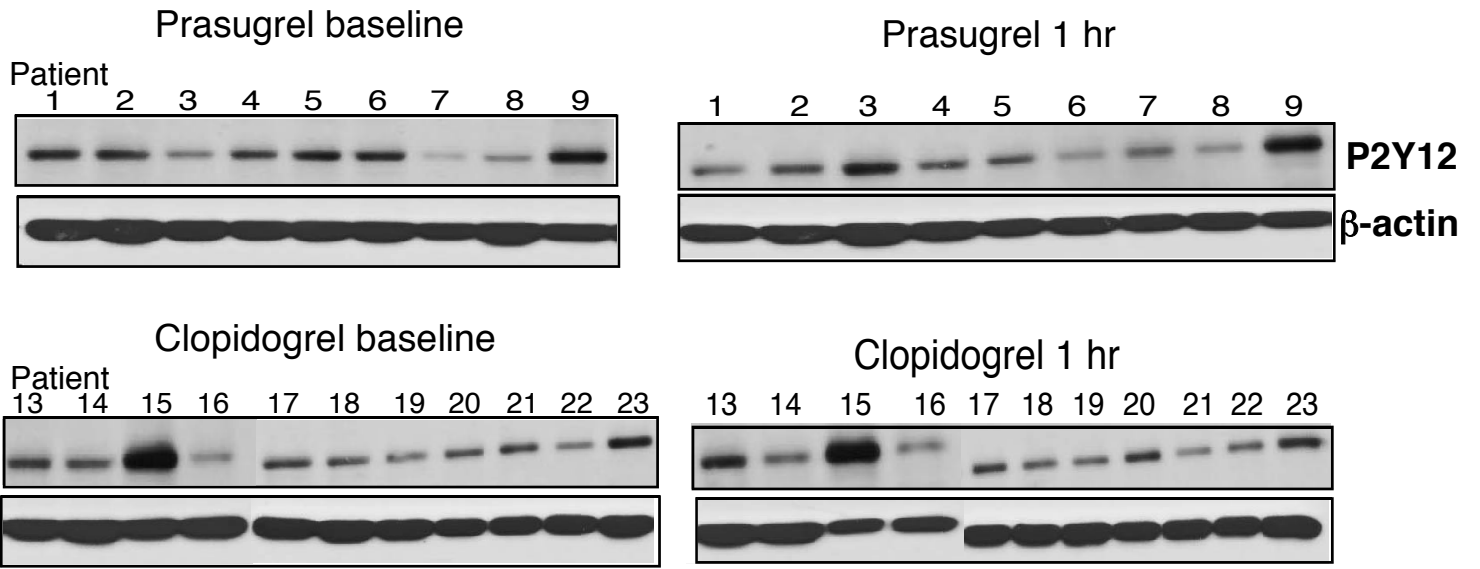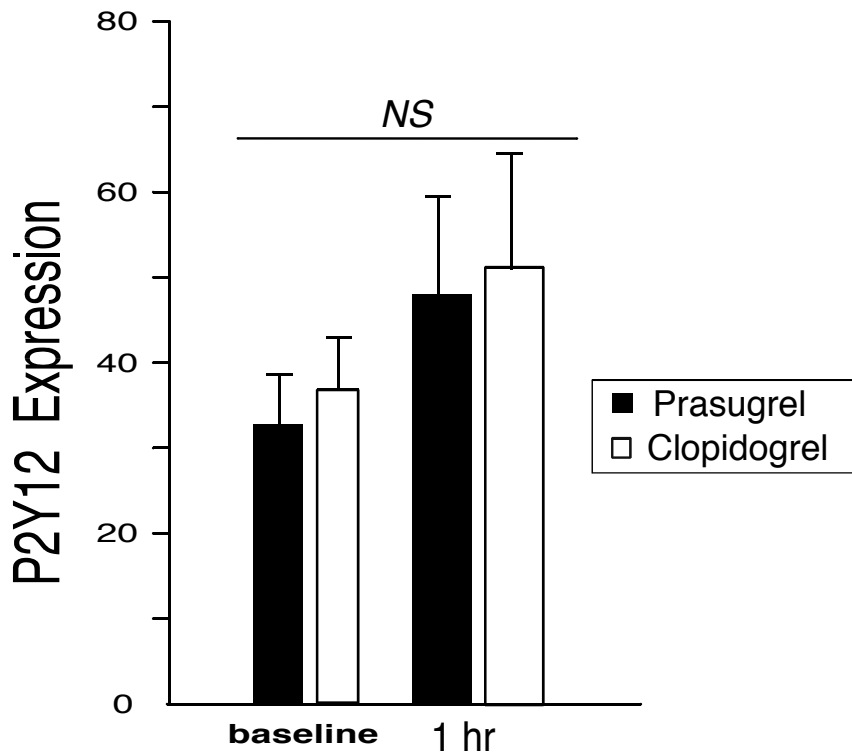

Supplemental Fig. 2

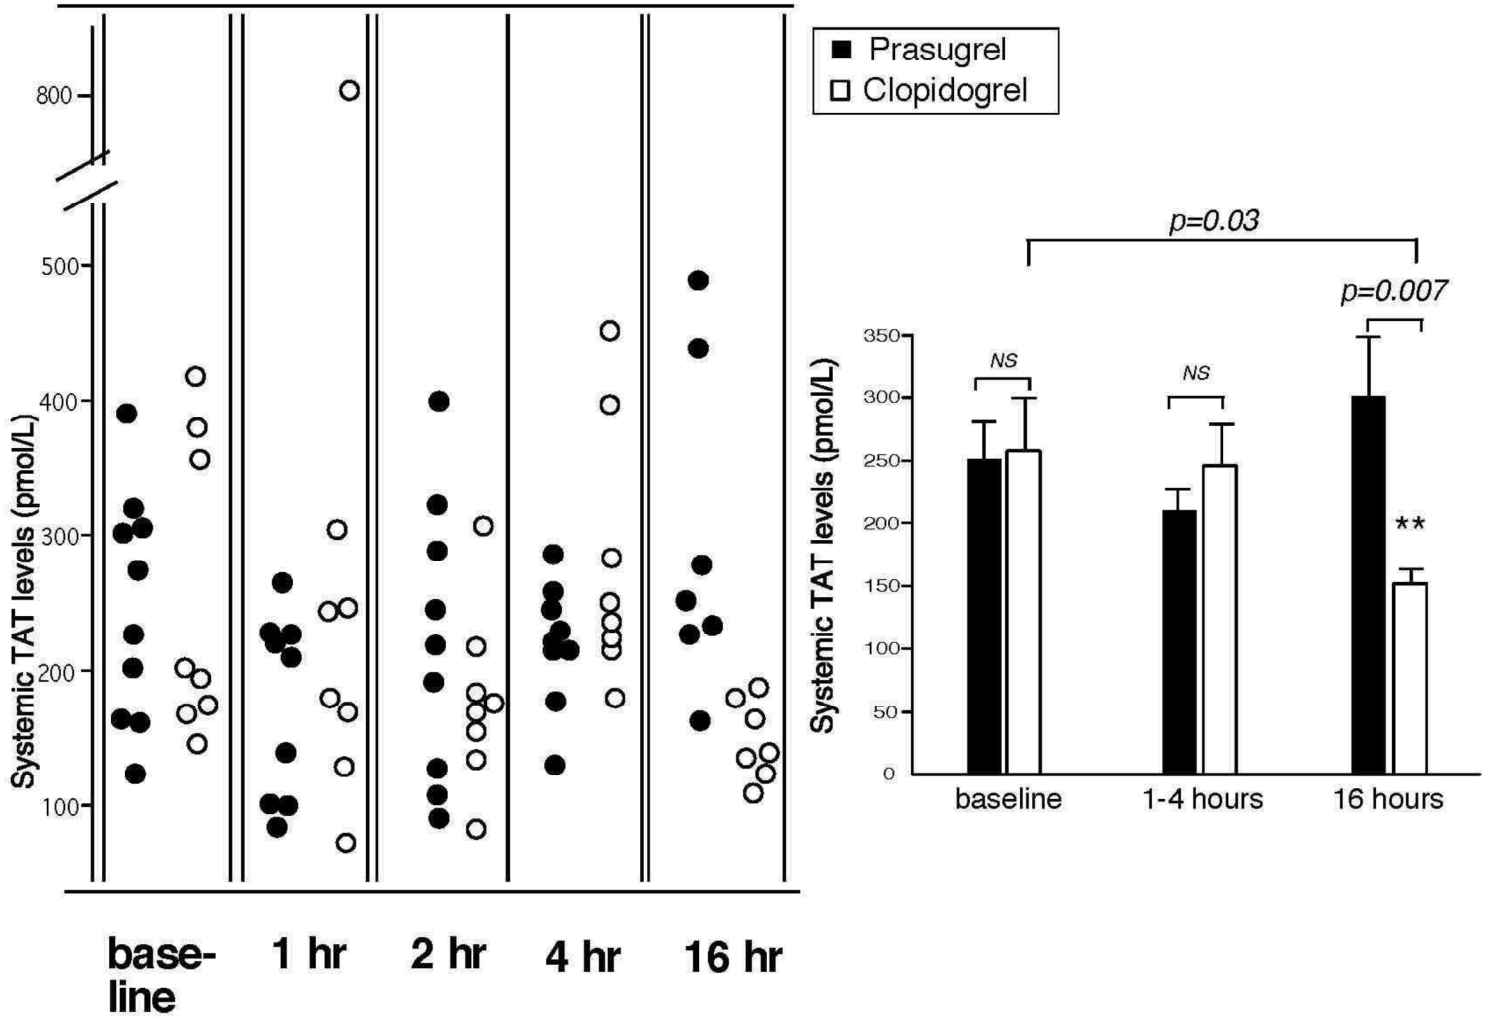

Supplement: NIHMS1055826-supplement-SF1_2.pdf [file NIHMS1055826-supplement-SF1_2.pdf]
